# Supplementary material
Source: PubMed Central journal article supplement (PMC6709760)
Supplement: attr-54-07-19_s01.pdf [file attr-54-07-19_s01.pdf]

**Supplemental Table 1. All Injuries (Excluding Lacrosse) by Sex and Season Segment**

| Variable              | Injury Rate per 10 000 AEs (95% CI) | IRR Versus Males (95% CI)      |                                 |                               |                                |
|-----------------------|-------------------------------------|--------------------------------|---------------------------------|-------------------------------|--------------------------------|
| Males                 | 0.65 (0.53, 0.77)                   | NA                             |                                 |                               |                                |
| Females               | 1.65 (1.46, 1.84) <sup>a</sup>      | 2.53 (2.04, 3.15) <sup>a</sup> |                                 |                               |                                |
|                       |                                     | IRR Versus Preseason           | IRR Versus Regular Season       |                               |                                |
| Preseason             | 1.08 (0.86, 1.30)                   | NA                             | NA                              |                               |                                |
| Regular season        | 1.20 (1.07, 1.34)                   | 1.12 (0.89, 1.41)              | NA                              |                               |                                |
| Postseason            | 0.80 (0.40, 1.21)                   | 0.74 (0.43, 1.28)              | 0.67 (0.4, 1.12)                |                               |                                |
|                       |                                     | IRR Versus Preseason           | IRR Versus Early Regular Season | IRR Versus Mid Regular Season | IRR Versus Late Regular Season |
| Preseason             | 1.21 (0.79, 1.64)                   | NA                             | NA                              | NA                            | NA                             |
| Early regular season  | 1.85 (1.35, 2.35)                   | 1.53 (0.98, 2.37)              | NA                              | NA                            | NA                             |
| Middle regular season | 1.33 (0.88, 1.77)                   | 1.09 (0.67, 1.77)              | 0.72 (0.47, 1.1)                | NA                            | NA                             |
| Late regular season   | 1.24 (0.83, 1.65)                   | 1.02 (0.63, 1.64)              | 0.67 (0.44, 1.02)               | 0.93 (0.58, 1.49)             | NA                             |
| Postseason            | 1.13 (0.29, 1.96)                   | 0.93 (0.41, 2.1)               | 0.61 (0.28, 1.34)               | 0.85 (0.38, 1.92)             | 0.91 (0.4, 2.05)               |

Abbreviations: AE, athlete-exposure; CI, confidence interval; IRR, incidence rate ratio; NA, not available.

<sup>a</sup>  $P < .05$ .

**Supplemental Table 2. Anterior Cruciate Ligament Injury by Specific Season Segment Restricted to Practices Only<sup>a</sup>**

| Season Segment               | All Injuries         |                                |                                | Noncontact        |                              |          |
|------------------------------|----------------------|--------------------------------|--------------------------------|-------------------|------------------------------|----------|
|                              | No.                  | Rate per 10 000 AEs (95% CI)   | AEs                            | No.               | Rate per 10 000 AEs (95% CI) | AEs      |
| Preseason                    | 40                   | 1.05 (0.72, 1.38)              | 380 835                        | 22                | 0.58 (0.34, 0.82)            | 380 835  |
| Early regular season         | 29                   | 1.10 (0.70, 1.50)              | 263 206                        | 21                | 0.80 (0.46, 1.14)            | 263 206  |
| Middle regular season        | 14                   | 0.57 (0.27, 0.87)              | 244 612                        | 7                 | 0.29 (0.07, 0.50)            | 244 612  |
| Late regular season          | 11                   | 0.43 (0.18, 0.68)              | 256 270                        | 6                 | 0.23 (0.05, 0.42)            | 256 ;270 |
| Postseason                   | 3                    | 0.42 (0.00, 0.91)              | 70 595                         | 2                 | 0.28 (0.00, 0.68)            | 70 595   |
| All Injuries IRR (95% CI)    |                      |                                |                                |                   |                              |          |
|                              | Early Regular Season | Middle Regular Season          | Late Regular Season            | Postseason        |                              |          |
| Versus preseason             | 1.05 (0.65, 1.69)    | 0.54 (0.30, 1.00)              | 0.41 (0.21, 0.80) <sup>b</sup> | 0.40 (0.13, 1.31) |                              |          |
| Versus early regular season  | NA                   | 0.52 (0.27, 0.98) <sup>b</sup> | 0.39 (0.19, 0.78) <sup>b</sup> | 0.39 (0.12, 1.27) |                              |          |
| Versus middle regular season | NA                   | NA                             | 0.75 (0.34, 1.65)              | 0.74 (0.21, 2.58) |                              |          |
| Versus late regular season   | NA                   | NA                             | NA                             | 0.99 (0.28, 3.55) |                              |          |
| Versus postseason            | NA                   | NA                             | NA                             | NA                |                              |          |
| Noncontact IRR (95% CI)      |                      |                                |                                |                   |                              |          |
| Versus preseason             | 1.38 (0.76, 2.51)    | 0.50 (0.21, 1.61)              | 0.41 (0.16, 1.00)              | 0.49 (0.12, 2.09) |                              |          |
| Versus early regular season  | NA                   | 0.36 (0.15, 0.84) <sup>b</sup> | 0.29 (0.12, 0.73) <sup>b</sup> | 0.36 (0.08, 1.51) |                              |          |
| Versus middle regular season | NA                   | NA                             | 0.82 (0.27, 2.43)              | 0.99 (0.21, 4.77) |                              |          |
| Versus late regular season   | NA                   | NA                             | NA                             | 1.21 (0.24, 6.00) |                              |          |
| Versus postseason            | NA                   | NA                             | NA                             | NA                |                              |          |

Abbreviations: AE, athlete-exposure; CI, confidence interval; IRR, incidence rate ratio; NA, not available.

<sup>a</sup> Analysis includes a subset of data restricted to 2009–2010 through 2015–2016.

<sup>b</sup>  $P < .05$ .
